# Supplementary material for: Is It Possible to Restrain OER on Simple Carbon Electrodes to Efficiently Electrooxidize Organic Pollutants?
Source: MDPI journal article supplement (doi:10.3390/molecules27165203), 2022-08-15
Supplement: s1 [file s1]

# Supplementary Materials

## Is It Possible to Restrain OER on Simple Carbon Electrodes to Efficiently Electrooxidize Organic Pollutants?

Marija Ječmenica Dučić <sup>1</sup>, Danka Aćimović <sup>1</sup>, Branislava Savić <sup>1</sup>, Lazar Rakočević <sup>2</sup>, Marija Simić <sup>1</sup>, Tanja Brdarić <sup>1</sup> and Dragana Vasić Anićijević <sup>1,\*</sup>

<sup>1</sup> University of Belgrade, Vinča Institute of Nuclear Sciences-National Institute of the Republic of Serbia, Department of Physical Chemistry, Mike Petrovića Alasa 12–14, 11001 Belgrade, Serbia

<sup>2</sup> University of Belgrade, Vinča Institute of Nuclear Sciences-National Institute of the Republic of Serbia, Department of Atomic Physics, Mike Petrovića Alasa 12–14, 11001 Belgrade, Serbia

\* Correspondence: draganav@vin.bg.ac.rs; Tel.: +381-11-34-08-287

**Table S1.** Atomic percents measured by XPS.

|               |      |   |
|---------------|------|---|
| <b>CNT Pb</b> |      |   |
| C 1s          | 82.9 | % |
| O 1s          | 11.1 | % |
| <b>Pb 4f</b>  | 6    | % |
| <b>CNT Sn</b> |      |   |
| C 1s          | 93.8 | % |
| O 1s          | 5.1  | % |
| Sn 3d         | 1.1  | % |
| <b>CNT</b>    |      |   |
| C 1s          | 98.7 | % |
| O 1s          | 1.3  | % |

Table S2. Fukui indices of Rhodamine B molecule.

| Nucleophilicity |          |          |          | Radical Attack |          |          |          |                       |
|-----------------|----------|----------|----------|----------------|----------|----------|----------|-----------------------|
|                 | RhB Atom | q(N)     | q(N - 1) | Fa-            | Rhb Atom | q(N + 1) | q(N - 1) | Fa0                   |
| 1               | O        | 7.857322 | 7.74038  | 0.116942       | O        | 7.906223 | 7.74038  | 0.165843              |
| 2               | O        | 7.670466 | 7.421019 | 0.249447       | O        | 7.747194 | 7.421019 | 0.326175              |
| 3               | O        | 7.637462 | 7.626688 | 0.010774       | O        | 7.645222 | 7.626688 | 0.018534              |
| 4               | N        | 7.446052 | 7.294789 | 0.151263       | N        | 7.499211 | 7.294789 | 0.204422              |
| 5               | N        | 6.975949 | 7.485839 | -0.50989       | N        | 6.930749 | 7.485839 | -0.55509              |
| 6               | C        | 1.132712 | 1.237361 | -0.10465       | C        | 1.126596 | 1.237361 | -0.11077              |
| 7               | C        | 4.094932 | 4.064295 | 0.030637       | C        | 4.103981 | 4.064295 | 0.039686              |
| 8               | C        | 4.071462 | 4.054048 | 0.017414       | C        | 4.087168 | 4.054048 | 0.03312               |
| 9               | C        | 3.998633 | 3.999706 | -0.00107       | C        | 4.011458 | 3.999706 | 0.011752              |
| 10              | C        | 4.085829 | 4.087221 | -0.00139       | C        | 4.090176 | 4.087221 | 0.002955              |
| 11              | C        | 4.007695 | 4.0054   | 0.002295       | C        | 4.011354 | 4.0054   | 0.005954              |
| 12              | C        | 4.046196 | 4.044938 | 0.001258       | C        | 4.079576 | 4.044938 | 0.034638              |
| 13              | C        | 4.071093 | 4.069466 | 0.001627       | C        | 4.073752 | 4.069466 | 0.004286              |
| 14              | C        | 4.018033 | 4.043469 | -0.02544       | C        | 4.023992 | 4.043469 | -0.01948              |
| 15              | C        | 4.059778 | 4.01796  | 0.041818       | C        | 4.056647 | 4.01796  | 0.038687              |
| 16              | C        | 3.260852 | 3.320457 | -0.05961       | C        | 3.215158 | 3.320457 | -0.1053               |
| 17              | C        | 3.217452 | 3.298414 | -0.08096       | C        | 3.179920 | 3.298414 | -0.11849              |
| 18              | C        | 3.677878 | 3.427324 | 0.250554       | C        | 3.643711 | 3.427324 | 0.216387              |
| 19              | C        | 3.691415 | 3.438835 | 0.25258        | C        | 3.732133 | 3.438835 | 0.293298              |
| 20              | C        | 4.054983 | 4.039877 | 0.015106       | C        | 4.074325 | 4.039877 | 0.034448              |
| 21              | C        | 4.079402 | 4.065299 | 0.014103       | C        | 4.090166 | 4.065299 | 0.024867              |
| 22              | C        | 3.955236 | 3.953486 | 0.00175        | C        | 3.979989 | 3.953486 | 0.026503              |
| 23              | C        | 4.000374 | 3.999982 | 0.000392       | C        | 4.039235 | 3.999982 | 0.039253              |
| 24              | C        | 4.01917  | 3.992409 | 0.026761       | C        | 4.041488 | 3.992409 | 0.049079              |
| 25              | C        | 2.479919 | 2.487303 | -0.00738       | C        | 2.470000 | 2.487303 | -0.0173               |
| 26              | C        | 4.020836 | 4.014758 | 0.006078       | C        | 3.999273 | 4.014758 | -0.01548              |
| 27              | C        | 3.030975 | 3.021861 | 0.009114       | C        | 3.092706 | 3.021861 | 0.070845              |
| 28              | C        | 2.631027 | 2.604319 | 0.026708       | C        | 2.691442 | 2.604319 | 0.087123              |
| 29              | C        | 3.326335 | 3.304751 | 0.021584       | C        | 3.325081 | 3.304751 | 0.02033               |
| 30              | C        | 4.787271 | 4.770424 | 0.016847       | C        | 4.780000 | 4.770424 | 0.009576              |
| 31              | C        | 3.970301 | 3.964803 | 0.005498       | C        | 3.990442 | 3.964803 | 0.025639              |
| 32              | C        | 4.019869 | 4.015367 | 0.004502       | C        | 4.017893 | 4.015367 | 0.002526              |
| 33              | C        | 3.958548 | 3.956734 | 0.001814       | C        | 3.995756 | 3.956734 | 0.039022              |
| 34              | H        | 0.92037  | 0.89109  | 0.02928        | H        | 0.952720 | 0.89109  | 0.06163               |
| 35              | H        | 0.963422 | 0.928827 | 0.034595       | H        | 0.994867 | 0.928827 | 0.06604               |
| 36              | H        | 0.874841 | 0.862776 | 0.012065       | H        | 0.893311 | 0.862776 | 0.030535              |
| 37              | H        | 0.950257 | 0.926371 | 0.023886       | H        | 0.970004 | 0.926371 | 0.043633              |
| 38              | H        | 0.972138 | 0.968097 | 0.004041       | H        | 0.970997 | 0.968097 | 0.0029                |
| 39              | H        | 0.958419 | 0.942727 | 0.015692       | H        | 0.969153 | 0.942727 | 0.026426              |
| 40              | H        | 1.006117 | 0.983609 | 0.022508       | H        | 1.022024 | 0.983609 | 0.038415              |
| 41              | H        | 0.973461 | 0.973067 | 0.000394       | H        | 0.971908 | 0.973067 | -0.00116              |
| 42              | H        | 0.995152 | 0.980892 | 0.01426        | H        | 1.005080 | 0.980892 | 0.024188              |
| 43              | H        | 0.97336  | 0.959972 | 0.013388       | H        | 0.997111 | 0.959972 | 0.037139              |
| 44              | H        | 0.982663 | 0.972234 | 0.010429       | H        | 0.997771 | 0.972234 | 0.025537              |
| 45              | H        | 0.924575 | 0.924899 | -0.00032       | H        | 0.924829 | 0.924899 | -7 × 10 <sup>-5</sup> |
| 46              | H        | 0.932392 | 0.914566 | 0.017826       | H        | 0.956409 | 0.914566 | 0.041843              |
| 47              | H        | 0.984957 | 0.974993 | 0.009964       | H        | 0.997832 | 0.974993 | 0.022839              |
| 48              | H        | 0.954584 | 0.953993 | 0.000591       | H        | 0.956705 | 0.953993 | 0.002712              |
| 49              | H        | 0.983982 | 0.925903 | 0.058079       | H        | 0.995835 | 0.925903 | 0.069932              |
| 50              | H        | 0.976985 | 0.952641 | 0.024344       | H        | 0.995835 | 0.952641 | 0.043194              |
| 51              | H        | 0.96807  | 0.953441 | 0.014629       | H        | 0.975736 | 0.953441 | 0.022295              |
| 52              | H        | 0.973857 | 0.950756 | 0.023101       | H        | 0.988661 | 0.950756 | 0.037905              |
| 53              | H        | 0.991473 | 0.976716 | 0.014757       | H        | 1.001558 | 0.976716 | 0.024842              |
| 54              | H        | 0.947746 | 0.940559 | 0.007187       | H        | 0.961080 | 0.940559 | 0.020521              |
| 55              | H        | 0.971623 | 0.95299  | 0.018633       | H        | 0.997012 | 0.95299  | 0.044022              |
| 56              | H        | 0.952402 | 0.946078 | 0.006324       | H        | 0.964061 | 0.946078 | 0.017983              |
| 57              | H        | 0.929275 | 0.91518  | 0.014095       | H        | 0.952839 | 0.91518  | 0.037659              |
| 58              | H        | 0.950161 | 0.919396 | 0.030765       | H        | 0.980346 | 0.919396 | 0.06095               |
| 59              | H        | 0.93309  | 0.904368 | 0.028722       | H        | 0.970795 | 0.904368 | 0.066427              |

|    |   |          |          |          |   |          |          |          |
|----|---|----------|----------|----------|---|----------|----------|----------|
| 60 | H | 0.933681 | 0.92346  | 0.010221 | H | 0.953662 | 0.92346  | 0.030202 |
| 61 | H | 0.918723 | 0.911726 | 0.006997 | H | 0.948127 | 0.911726 | 0.036401 |
| 62 | H | 0.938901 | 0.917584 | 0.021317 | H | 0.959243 | 0.917584 | 0.041659 |
| 63 | H | 0.907826 | 0.882045 | 0.025781 | H | 0.943425 | 0.882045 | 0.06138  |

C-atoms 18 and 19, which are identified as the most reactive carbon atoms according to the indices, belong to ethyl groups bound to N – heteroatoms. **NOTE:** Although reactive, oxygen heteroatoms were not taken into consideration in cleavage site prediction, since their reactivity does not contribute to the cleavage of carbon chain.

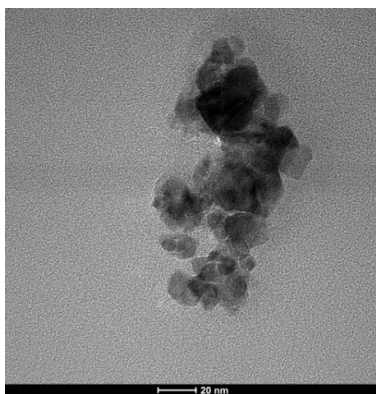

**Figure S1.** TEM micrograph of bare SnO<sub>2</sub> powder.
